# Supplementary material for: Synthesis of 2,5-furandicarboxylic acid by a TEMPO/laccase system coupled with Pseudomonas putida KT2440
Source: Royal Society of Chemistry journal article supplement (doi:10.1039/d0ra03089a), 2020-01-01
Supplement: d0ra03089a1.pdf [file d0ra03089a1.pdf]

Electronic Supplementary Information

**Synthesis of 2,5-furandicarboxylic acid from 5-hydroxymethylfurfural by a TEMPO/laccase system coupled with *Pseudomonas putida* KT2440**

Lihua Zou,<sup># a</sup> Zhaojuan Zheng,<sup># a,b,c</sup> Huanghong Tan<sup>a</sup>, Qianqian Xu<sup>a</sup>, Jia Ouyang<sup>\*a,b,c</sup>

<sup>a</sup>Jiangsu Co-Innovation Center of Efficient Processing and Utilization of Forest Resources, College of Chemical Engineering, Nanjing Forestry University, Nanjing 210037, People's Republic of China

<sup>b</sup>Key Laboratory of Forestry Genetics & Biotechnology (Nanjing Forestry University), Ministry of Education, Nanjing 210037, People's Republic of China

<sup>c</sup>Jiangsu Province Key Laboratory of Green Biomass-based Fuels and Chemicals, Nanjing 210037, People's Republic of China

<sup>#</sup>These authors contributed equally to this work.

<sup>\*</sup>Corresponding author. Address: College of Chemical Engineering, Nanjing Forestry University, Nanjing 210037, People's Republic of China, Tel.: 86-025-85427129, Fax: 86-025-85427587, E-mail: [hgouyj@njfu.edu.cn](mailto:hgouyj@njfu.edu.cn).

## Figures and Table Captions

**Fig. S1** DFF and FFCA transformation by *P. putida* KT2440.

**Fig. S2** Effect of initial pH on the synthesis of FDCA catalyzed by *P. putida* KT2440.

**Table S1.** Effect of concentration of FFCA and buffer on the catalysis of *P. putida* KT2440.

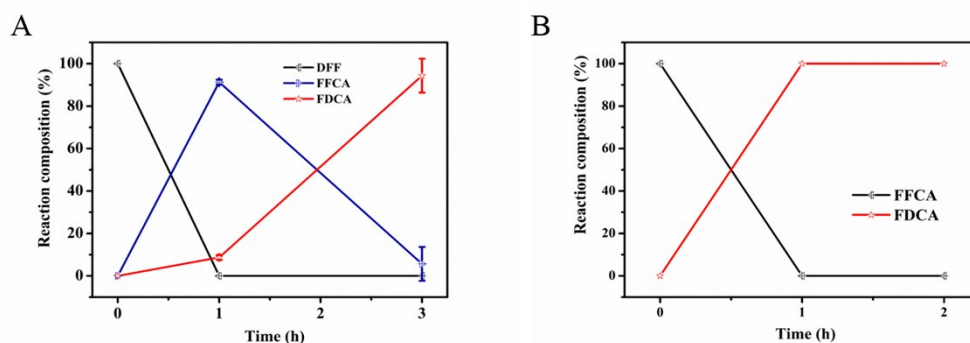

**Fig. S1** DFF and FFCA transformation by *P. putida* KT2440.

Reaction conditions: 50 mM DFF (A) or FFCA (B), 6 mg mL<sup>-1</sup> microbial cells in 20 mL phosphate buffer (200 mM, pH 7.0), 50 mM CaCO<sub>3</sub>, 200 rpm, 30 °C.

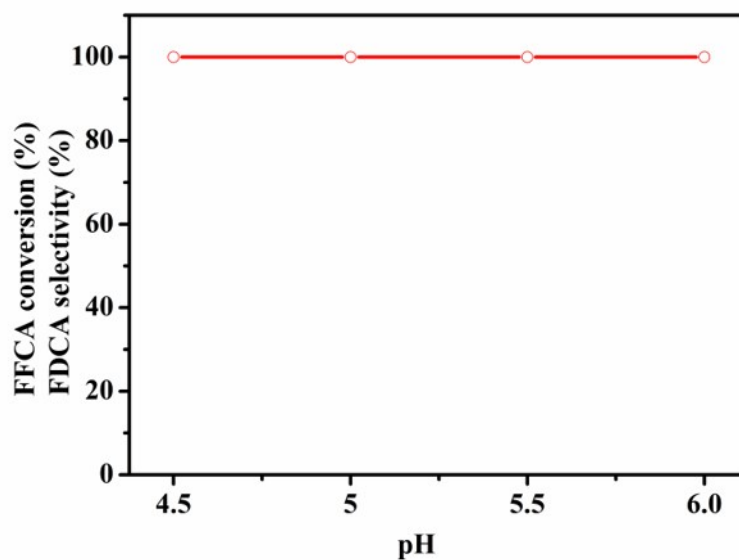

**Fig. S2** Effect of initial pH on the synthesis of FDCA catalyzed by *P. putida* KT2440.

Reaction conditions: 100 mM FFCA and 10 mg mL<sup>-1</sup> microbial cells in 5 mL acetate buffer (200 mM), 100 mM CaCO<sub>3</sub>, 200 rpm, 30 °C.

**Table S1.** Effect of the concentrations of FFCA and acetate buffer on the catalysis of *P. putida* KT2440.

| Entry | FFCA (mM) | Buffer (mM) | FFCA conversion (%) | FDCA selectivity (%) |
|-------|-----------|-------------|---------------------|----------------------|
| 1     | 100       | 200         | 100                 | 100                  |
| 2     | 150       | 200         | 100                 | 100                  |
| 3     | 200       | 200         | 100                 | 100                  |
| 4     | 100       | 400         | 100                 | 100                  |
| 5     | 150       | 400         | 100                 | 100                  |
| 6     | 200       | 400         | 100                 | 100                  |

Reaction conditions: 100-200 mM FFCA, 10 mg mL<sup>-1</sup> microbial cells in 5 mL acetate buffer (200-400 mM, pH 6), 50-100 mM CaCO<sub>3</sub>, 200 rpm, 30 °C.
